## 1 **Title**

2 CIITA induces expression of MHC-I and MHC-II in transmissible cancers

## 3 **Running title**

4 Regulation of MHC by CIITA in DFT cells

## 5 **Authors**

6 Chrissie E. B. Ong<sup>1</sup>, Yuanyuan Cheng<sup>2</sup>, Hannah V. Siddle<sup>3,4</sup>, A. Bruce Lyons<sup>5</sup>, Gregory M.  
7 Woods<sup>1</sup>, Andrew S. Flies<sup>1\*</sup>

## 8 **Affiliations**

9 <sup>1</sup>Menzies Institute for Medical Research, College of Health and Medicine, University of  
10 Tasmania, Hobart, TAS, Australia

11 <sup>2</sup>School of Life and Environmental Sciences, The University of Sydney, Sydney, NSW,  
12 Australia

13 <sup>3</sup>Department of Biological Sciences, University of Southampton, Southampton, UK

14 <sup>4</sup>Institute for Life Sciences, University of Southampton, Southampton, UK

15 <sup>5</sup>Tasmanian School of Medicine, College of Health and Medicine, University of Tasmania,  
16 Hobart, TAS, Australia

## 17 **\*Correspondence**

18 **Andrew S. Flies, PhD**

19 Menzies Institute for Medical Research, College of Health and Medicine

20 University of Tasmania

21 Private Bag 23, Hobart TAS 7000

22 phone: +61 3 6226 4614; email: [Andy.Flies@utas.edu.au](mailto:Andy.Flies@utas.edu.au)

## 23 **Abstract**

24 MHC-I and MHC-II molecules are critical components of antigen presentation and T cell  
25 immunity to pathogens and cancer. The two monoclonal transmissible devil facial tumours  
26 (DFT1, DFT2) exploit MHC-I pathways to overcome immunological anti-tumour and  
27 allogeneic barriers. This exploitation underpins the ongoing transmission of DFT cells across  
28 the wild Tasmanian devil population. We have previously shown that constitutive expression  
29 of NLRC5 can induce stable upregulation of MHC-I on DFT1 and DFT2 cells, but unlike  
30 IFNG-treated cells, NLRC5 does not upregulate PDL1. MHC-II expression is crucial for CD4<sup>+</sup>  
31 T cell activation and is primarily confined to haematopoietic antigen presenting cells.  
32 Transcriptomic analysis of DFT1 and DFT2 cell lines showed that several genes of the MHC-

33 I and MHC-II pathways were upregulated in response to constitutive overexpression of the  
34 class II transactivator (CIITA) gene. This was further supported by upregulation of MHC-I  
35 protein on DFT1 and DFT2 cells, but interestingly MHC-II protein was upregulated only on  
36 DFT1 cells. The functional significance of the MHC upregulation on DFT cells was shown  
37 using serum from devils with natural or immunotherapy-induced DFT1 regressions; binding of  
38 serum IgG was stronger in CIITA-transfected cells than wild type cells, but was less than  
39 binding to NLRC5 transfected cells. This new insight into regulation of MHC-I and MHC-II  
40 in cells that naturally overcome allogeneic barriers can inform vaccine, immunotherapy, and  
41 tissue transplant strategies for human and veterinary medicine.

## 42 **Keywords**

43 transmissible cancer, devil facial tumour, DFTD, allograft, MHC, CIITA

## 44 **1. Introduction**

45 The Tasmanian devil is the largest extant carnivorous marsupial and is endemic to the island  
46 state of Tasmania. Following the emergence of devil facial tumour disease (DFTD) in 1996,  
47 the population of devils has declined precipitously, threatening the persistence of devils in the  
48 wild<sup>1</sup>. DFTD is caused by two independent transmissible cancers of Schwann cell origin,  
49 referred herein as DFT1 and DFT2<sup>2,3</sup>. DFT1 was discovered northeast of Tasmania in 1996  
50 while the second tumour, DFT2, was found in 2014 in the D'Entrecasteaux channel, southeast  
51 Tasmania. Both tumour types are clonal cell lines that harbour distinct genetic profiles differing  
52 from individual host devils<sup>2,3</sup>. DFT cells are transmitted as a malignant allograft amongst devils  
53 through social interactions.

54 Genetic differences between host and tumour, particularly at the major histocompatibility  
55 complex (MHC) loci<sup>4</sup>, should induce immune-mediated allograft rejection. However, the 25  
56 years of ongoing DFT1 transmission suggests that DFT1 cells have evolved to evade immune  
57 defences. The lack of anti-DFT immune responses has predominantly focused on the loss of  
58 MHC-I from the surface of DFT1 cells. This occurs via epigenetic downregulation of several  
59 components of the MHC-I antigen processing pathway<sup>5</sup> and a hemizygous deletion of beta-2  
60 microglobulin (*B2M*), which is necessary for stabilising MHC-I complexes on the cell surface<sup>6</sup>.  
61 Natural and immunotherapy-induced tumour regressions have been observed in devils, along  
62 with antibody responses to DFT1 cells, albeit primarily in the context of MHC-I<sup>7-9</sup>. Conversely,  
63 the emerging DFT2 tumours do express MHC-I<sup>10</sup>, suggesting that other immune evasion  
64 mechanisms are important.

65 Given the role of MHC-I in antigen display and anti-DFT humoral response, the manipulation  
66 of MHC-I expression on DFT cells is an attractive target to improve host responses towards  
67 DFT cells and mitigate the effects of disease in the wild devil population. An upregulation of  
68 MHC-I on DFT cells should enhance MHC-I-restricted tumour-specific cytotoxic CD8<sup>+</sup> T cell  
69 response. However, this approach alone proved to be insufficient for eliciting protective  
70 immunity, as exemplified in immunisation trials of naïve devils against DFT1<sup>9</sup>. Although CD8<sup>+</sup>  
71 T cells are recognised as the major effector cells in tumour elimination, CD4<sup>+</sup> T cell help is  
72 critical in facilitating an effective anti-tumour immune response. CD4<sup>+</sup> helper T cells play a  
73 multifaceted role of orchestrating the adaptive and humoral immune response. From cytokine  
74 production to expression of co-stimulatory molecules, CD4<sup>+</sup> helper T cells initiate, augment,  
75 and sustain the effector function of not only CD8<sup>+</sup> T cells and B cells but also innate cells<sup>11-14</sup>.  
76 Moreover, CD4<sup>+</sup> T cells are capable of initiating allograft rejection independently of CD8<sup>+</sup> T  
77 cells<sup>15,16</sup>.

78 The activation of CD4<sup>+</sup> T cells involves recognition of antigens presented on MHC-II  
79 complexes. In contrast to MHC-I, constitutive expression of MHC-II is restricted to thymic  
80 epithelial cells, activated human T cells, and professional antigen presenting cells (APCs) such  
81 as B cells, dendritic cells, and macrophages. However, *de novo* MHC-II expression can be  
82 induced in non-haematopoietic cells including tumour cells by the inflammatory cytokine  
83 interferon gamma (IFNG)<sup>17</sup>. Both constitutive and IFNG-induced expression of MHC-II genes  
84 are mediated by the Class II transactivator (CIITA), making it the master regulator of MHC-II  
85 expression<sup>18,19</sup>. Additionally, CIITA is capable of modulating the expression of MHC-I,  
86 particularly in cell lines with low to no MHC-I expression<sup>20,21</sup>.

87 The presence of MHC-II molecules in DFT cells has not been described, although CIITA and  
88 some MHC-II transcripts can be upregulated *in vitro* in DFT1 cells with IFNG treatment<sup>5</sup>. We  
89 have previously genetically modified DFT1 and DFT2 cells that overexpress the MHC-I  
90 transactivator NLRC5 to induce stable expression of MHC-I on the cell surface<sup>8</sup>. The lack of  
91 MHC-II expression in DFT cells provided an opportunity to conduct similar investigations into  
92 the role of CIITA in MHC-II regulation in marsupials and transmissible cancers.  
93 Transcriptomic and protein-based analyses showed that CIITA upregulates the expression of  
94 genes associated with MHC-I and MHC-II antigen processing and presentation in DFT cells.  
95 The ability to modulate antigen presentation in transmissible cancer cells in the context of  
96 MHC uncovers additional targets for anti-tumour immune response and the potential for  
97 recruitment of CD4<sup>+</sup> T cell help.

## 98 2. Materials and methods

### 99 2.1 Cells and cell culture conditions

100 Cell lines that were used in this study include DFT1 cell line C5065 strain 3<sup>22</sup>  
101 (RRID:CVCL\_LB79), and DFT2 cell lines: RV (RRID:CVCL\_LB80) and JV  
102 (RRID:CVCL\_A1TN)<sup>3</sup> (**Table 1**). DFT1 C5065 was provided by A-M Pearse and K. Swift of  
103 the Department of Primary Industries, Parks, Water and Environment (DPIPWE) (Hobart,  
104 TAS, Australia) and was previously established from DFT1 biopsies obtained under the  
105 approval of the Animal Ethics Committee of the Tasmanian Parks and Wildlife Service (permit  
106 numbers A0017090 and A0017550)<sup>22</sup>. DFT2 cell lines RV and JV were established from single  
107 cell suspensions obtained from tumour biopsies<sup>3</sup>. Cells were cultured at 35 °C with 5% CO<sub>2</sub> in  
108 Gibco™ RPMI 1640 medium with L-glutamine (Thermo Fisher Scientific, Waltham, MA,  
109 USA) supplemented with 10% heat-inactivated fetal bovine serum (Bovogen Biologicals,  
110 Melbourne, VIC, Australia), 1% (v/v) Gibco™ Antibiotic-Antimycotic (100X) (Thermo Fisher  
111 Scientific), 10 mM Gibco™ HEPES (Thermo Fisher Scientific) and 50 μM 2-mercaptoethanol  
112 (Sigma-Aldrich, St. Louis, MO, USA) (complete RPMI medium).

### 113 2.2 Plasmid construction

114 The coding sequence for full length devil *CIITA* (XM\_023497584.2) was isolated from cDNA  
115 of devil peripheral blood mononuclear cells (PBMCs) by PCR using Q5® Hotstart High-  
116 Fidelity 2X Master Mix (New England Biolabs (NEB), Ipswich, MA, USA) (see  
117 **Supplementary Table 1** for list of primers and reaction conditions). Sleeping Beauty (SB)  
118 transposon plasmid pSBbi-BH<sup>23</sup> (a gift from Eric Kowarz; Addgene # 60515, Cambridge, MA,  
119 USA) was digested at SfiI sites (NEB) with the addition of Antarctic Phosphatase (NEB) to  
120 prevent re-ligation. Devil *CIITA* was then cloned into SfiI-digested pSBbi-BH using  
121 NEBuilder® HiFi DNA Assembly Cloning Kit (NEB). The assembled plasmid pCO2 was  
122 transformed into NEB® 5-alpha competent *Escherichia coli* (High Efficiency) (NEB)  
123 according to manufacturer's instructions (see **Supplementary Figure 1** for plasmid maps).  
124 Positive clones were identified by colony PCR and the plasmids were isolated using  
125 NucleoSpin® Plasmid EasyPure kit (Macherey-Nagel, Düren, Germany). The DNA sequence  
126 of the cloned devil *CIITA* transcript was verified by Sanger sequencing using Big Dye™  
127 Terminator v3.1 Cycle Sequencing Kit (Applied Biosystems (ABI), Foster City, CA, USA) and  
128 Agencourt® CleanSEQ® (Beckman Coulter, Brea, CA, USA) per manufacturer's instructions.  
129 The sequences were analyzed on 3500xL Genetic Analyzer (ABI) (see **Supplementary Table**

130 2 for list of sequencing primers). For detailed step-by-step protocols for plasmid design and  
131 construction, reagent recipes, and generation of stable cell lines, see Bio-protocol # e3696<sup>24</sup>.

### 132 **2.3 Transfection and generation of stable cell lines**

133 DFT1 and DFT2 cell line C5065 and JV, respectively, were transfected with plasmid pCO2 to  
134 generate stable cell lines that overexpress CIITA. DNA transfections were performed using  
135 polyethylenimine (PEI) (1 mg/mL, linear, 25 kDa; Polysciences, Warrington, FL, USA) at a  
136 3:1 ratio of PEI to DNA (w/w) as previously described<sup>8</sup>. Briefly, DFT cells were co-transfected  
137 with pCO2 and SB transposase vector pCMV(CAT)T7-SB100<sup>25</sup> (a gift from Zsuzsanna Izsvak;  
138 Addgene plasmid # 34879) at a ratio of 3:1 in µg, respectively. One µg of total plasmid DNA  
139 was used per mL of culture volume. The cells were incubated with the transfection solution  
140 overnight at 35 °C with 5% CO<sub>2</sub>. The media was removed and replaced with fresh complete  
141 RPMI medium. 48 h post-transfection, the cells were observed for expression of reporter gene  
142 mTagBFP. Positively-transfected cells were selected with 1 mg/mL hygromycin B (Sigma-  
143 Aldrich) for seven days before being maintained in 200 µg/mL hygromycin B in complete  
144 RPMI medium. The two tumour cell lines were also transfected with empty vector pSBbi-BH  
145 as controls.

### 146 **2.4 RNA sequencing and analysis**

147 RNA libraries were prepared, sequenced and processed as previously described<sup>8,26,27</sup>. **Table 1**  
148 shows the source of RNA samples used in this study. Briefly, RNA extraction (two replicates  
149 per cell line) was performed using the Nucleospin® RNA Plus Kit (Macherey-Nagel)  
150 following the manufacturer's instructions. mRNA libraries were prepared and sequenced at the  
151 Ramaciotti Centre for Genomics (Sydney, NSW, Australia). All RNA samples had RNA  
152 Integrity Number (RIN) scores of 10.0. Libraries were prepared using TruSeq Stranded mRNA  
153 Library Prep (Illumina Inc., San Diego, CA, USA) and single-end, 100-base pair sequencing  
154 were performed on an Illumina NovaSeq 6000 platform (Illumina). The quality of the  
155 sequencing reads was assessed using FastQC version 0.11.9<sup>28</sup>. Raw FASTQ files for  
156 DFT1.CIITA and DFT2.CIITA have been deposited to the European Nucleotide Archive  
157 (ENA) and are available at BioProject # PRJEB45867.

158 Subread version 2.0.0<sup>29</sup> was used to align sequencing reads to the Tasmanian devil reference  
159 genome (GCA\_902635505.1 mSarHar1.11) and the number of reads mapped to a gene was  
160 counted using featureCounts<sup>30</sup>. The analysis of differentially expressed genes was performed  
161 using the statistical software R studio<sup>31</sup> on R version 4.0.0<sup>32</sup>. Genes with less than 100 aligned

162 reads across all samples were excluded from the analysis and raw library sizes were scaled  
163 using *calcNormFactors* in edgeR<sup>33-35</sup>. To account for varying sequencing depths between  
164 lanes, read counts were normalised by upper quartile normalisation using  
165 *betweenLaneNormalization* in EDASeq<sup>36,37</sup>. Gene length-related biases were normalised by  
166 scaling read counts to transcripts per kilobase million (TPM). Differential expression analysis  
167 was carried out using the *voom*<sup>38</sup> function in *limma*<sup>39</sup> with linear modelling and empirical Bayes  
168 moderation<sup>40</sup>. To isolate differentially expressed genes, gene expression of CIITA- or NLRC5-  
169 expressing cell lines (DFT.CIITA, DFT.NLRC5) was compared against vector-only control  
170 (DFT.BFP) while IFNG-treated cells (DFT.WT + IFNG) was compared against untreated cells  
171 (DFT.WT), according to their respective tumour origin. Genes were defined as significantly  
172 differentially expressed by applying false discovery rate (FDR) < 0.05, and log<sub>2</sub> fold change  
173 (FC) ≥ 2.0 (upregulated) or ≤ -2.0 (downregulated) thresholds (see **Supplementary Table 3**  
174 for list of differentially expressed genes).

175 Venn diagrams of differentially expressed genes were developed using Venny version 2.1<sup>41</sup>.  
176 Heatmaps were created from log<sub>2</sub>(TPM) values using the ComplexHeatmap<sup>42</sup> package in R  
177 studio. For functional enrichment analysis, over-representation of gene ontology (GO)  
178 biological processes in the list of differentially expressed genes was performed using Database  
179 for Annotation, Visualization and Integrated Discovery (DAVID) functional annotation  
180 tool<sup>43,44</sup>. The Tasmanian devil *Sarcophilus harrisii* was applied as the species for gene lists and  
181 background. Significant GO terms (GOTERM\_BP\_ALL) were selected by applying the  
182 following thresholds: p-value < 0.05 and FDR < 0.05. GO terms were sorted in descending  
183 order of fold enrichment values.

184 To simplify the identification of devil MHC allotypes and maintain consistency in  
185 nomenclature to previous works, MHC transcripts in this manuscript were renamed according  
186 to Cheng et al., based on sequence similarity<sup>45</sup> (see **Supplementary Table 4** for corresponding  
187 NCBI gene symbols). MHC transcripts *LOC100918485* and *LOC100918744*, which have not  
188 been previously characterised, are predicted to encode beta chains of the MHC-II DA gene  
189 based on gene homology. These transcripts were renamed as *SAHA-DAB\_X1* and *SAHA-*  
190 *DAB\_X2*, respectively. Similarly, genes without an official gene symbol (LOC prefixes) were  
191 given aliases based on the gene description on NCBI.



## 192 **2.5 Flow cytometric analysis of B2M and MHC-II expression**

193 Cultured cells were harvested using TrypLE™ Express Enzyme (1X) (Thermo Fisher  
194 Scientific) and counted using a haemocytometer.  $1 \times 10^5$  cells per well were aliquoted into  
195 round-bottom 96-well plates and washed with 1X PBS (Thermo Fisher Scientific). Washing  
196 steps include centrifugation at 500g for 3 min at 4 °C to pellet cells before removal of  
197 supernatant. Cells were first stained with Invitrogen™ LIVE/DEAD™ Fixable Near-IR Dead  
198 Cell Stain kit (Thermo Fisher Scientific) diluted according to manufacturer's instructions for  
199 30 min on ice, protected from light. After staining, cells were washed twice with 1X PBS. For  
200 MHC-II expression, a monoclonal mouse antibody against the intracellular tail of human HLA-  
201 DR  $\alpha$  chain was used (Clone TAL.1B5, # M0746, Agilent, Santa Clara, CA, USA). Detection  
202 of MHC-I on the surface of cells was performed using a monoclonal mouse antibody against  
203 devil beta-2-microglobulin (B2M) in supernatant (Clone 13-34-45; a gift from Hannah  
204 Siddle<sup>5</sup>). Cells for intracellular staining of HLA-DR were first fixed and permeabilised using  
205 BD Cytotfix/Cytoperm™ Plus Fixation/Permeabilization Kit (BD Biosciences, North Ryde,  
206 NSW, Australia). All intracellular antibody staining, and washes were carried out in 1X BD  
207 Perm/Wash™ Buffer (BD Biosciences) while FACS buffer (PBS with 0.5% BSA, 0.02%  
208 sodium azide) was used for surface antibody staining. All cells were incubated with 1% normal  
209 goat serum (Thermo Fisher Scientific) for blocking, 10 min on ice. After that, cells were  
210 washed and incubated with either anti-human HLA-DR $\alpha$  (0.48  $\mu\text{g}/\text{mL}$ ) or anti-devil B2M  
211 antibody (1:250 v/v dilution) for 30 min on ice. Cells were washed once and stained with goat  
212 anti-mouse IgG-Alexa Fluor 488 (2  $\mu\text{g}/\text{mL}$ , # A11029, Thermo Fisher Scientific) for 30 min  
213 on ice, in the dark. Two final washes were given to remove excess secondary antibody. Fixed  
214 cells were resuspended in FACS buffer while the rest were resuspended in FACS fix solution  
215 (0.02% sodium azide, 1.0% glucose, 0.4% formaldehyde). Analysis was carried out using  
216 Cytex™ Aurora (Cytex Biosciences, Fremont, CA, USA). As a positive control for MHC-I  
217 expression, DFT cells were treated with 10 ng/mL devil recombinant IFNG<sup>46</sup> for 24 h.

## 218 **2.6 Protein extraction and western blot**

219 Cells were harvested and centrifuged at 500g for 5 min at room temperature. The pellet was  
220 washed twice with cold 1X PBS and weighed. Total cell protein was extracted by adding 1 mL  
221 RIPA Lysis and Extraction Buffer (Thermo Fisher Scientific), 10  $\mu\text{L}$  Halt™ Protease Inhibitor  
222 Cocktail (Thermo Fisher Scientific) and 10  $\mu\text{L}$  Halt™ Phosphatase Inhibitor Cocktail (Thermo  
223 Fisher Scientific) per 40 mg of wet cell pellet. The suspension was sonicated for 30 seconds  
224 with 50% pulse and then mixed gently for 15 min on ice. The mixture was centrifuged at

225 14000g for 15 min to pellet the cell debris. The supernatant was transferred to a new tube and  
226 total protein was quantified using EZQ® Protein Quantitation kit (Invitrogen) according to  
227 manufacturer's instructions. Two replicates per cell line were prepared for protein extraction.

228 20 µg of protein per sample was used for target protein detection by western blot. Protein  
229 samples were subjected to SDS-PAGE using Bolt™ 4-12%, Bis-Tris, 1.0 mm Mini Protein Gel  
230 (Thermo Fisher Scientific). Briefly, protein samples were treated with 1X Bolt™ LDS Sample  
231 Buffer (Thermo Fisher Scientific) and 1X Bolt™ Reducing Agent (Thermo Fisher Scientific)  
232 at 70 °C for 10 min. Samples were loaded onto the gel and run with 1X Bolt™ MES SDS  
233 Running Buffer (Thermo Fisher Scientific) in the Mini Gel Tank (Thermo Fisher Scientific) at  
234 100 V for 5 min followed by 200 V for 15 min. SeeBlue™ Plus2 Pre-stained Protein Standard  
235 (Thermo Fisher Scientific) was used as a molecular weight marker. Proteins were transferred  
236 to a nitrocellulose membrane using iBlot™ Transfer Stack, nitrocellulose, mini (Thermo Fisher  
237 Scientific) and iBlot™ Gel Transfer Device (Thermo Fisher Scientific) using the following  
238 settings: 20 V for 7.5 min.

239 For immunodetection, the membrane was blocked with TBSTM (Tris-buffered saline (TBS):  
240 50 mM Tris-HCl, 150 mM NaCl, pH 7.6), 0.05% Tween 20, and 5% skim milk) for 1 hour at  
241 room temperature and rinsed twice with TBST (TBS, 0.05% Tween 20). Then, the membrane  
242 was incubated with: (i) rabbit polyclonal anti-beta actin antibody (# ab8227, Abcam,  
243 Cambridge, UK) diluted in TBSTM (400 ng/mL), (ii) mouse monoclonal anti-devil SAHA-  
244 UA/UB/UC in supernatant (Clone 15-25-18; a gift from Hannah Siddle<sup>10</sup>), or (iii) mouse  
245 monoclonal anti-devil SAHA-UK in supernatant (Clone 15-29-1; a gift from Hannah Siddle<sup>10</sup>)  
246 overnight at 4 °C. The membranes were washed four times with TBST for a duration of 5 min  
247 each wash. After that, the membranes were incubated with either HRP-conjugated goat anti-  
248 mouse (250 ng/mL; # P0447, Agilent) or HRP-conjugated goat anti-rabbit immunoglobulin  
249 (62.5 ng/mL; # P0448, Agilent) diluted in TBSTM for 1 hour at room temperature. The  
250 membranes were given final washes as described above. All incubation and washing steps were  
251 performed under agitation. Target protein expression was detected using Immobilon™ Western  
252 Chemiluminescent HRP Substrate (Merck Millipore, Burlington, MA, USA) according to  
253 manufacturer's protocol. Protein bands were visualised using Amersham™ Imager 600 (GE  
254 Healthcare Life Sciences, Malborough, MA, USA).



## 255 **2.7 Flow cytometric analysis of serum antibody binding**

256 Serum samples from four devils (My, TD4, TD5, and TD6), collected before (pre-immune)  
257 and after DFT1 clinical manifestations (immune), were used to assess antibody responses  
258 towards CIITA-expressing DFT cell lines (**Supplementary Table 5**). The serum samples were  
259 identified as immune from the presence of anti-DFT1 antibodies, which were found to be  
260 predominantly against MHC-I on DFT1 cells<sup>8</sup>. ‘My’ was a devil that was immunised,  
261 challenged with DFT1 cells, and subsequently treated with an experimental immunotherapy  
262 that induced tumour regression<sup>9</sup>. TD4, TD5, and TD6 were naturally DFT1-infected wild devils  
263 with either spontaneous tumour regressions (TD4); MHC-II<sup>+</sup> and CD3<sup>+</sup> tumour-infiltrating  
264 lymphocytes in the tumour (TD5); or B2M<sup>+</sup> DFT1 cells in fine needle aspirations of a tumour  
265 (TD6)<sup>7</sup>. A devil with no clinical signs of DFTD during serum collection (TD7) was included  
266 as a negative control for antibody binding towards the DFT cell lines.

267 Cells were harvested and aliquoted into round-bottom 96-well plates as indicated above. After  
268 washing with PBS, cells were stained with LIVE/DEAD™ Fixable Near-IR Dead Cell Stain  
269 for 30 min on ice and washed twice with PBS. For blocking, cells were incubated with 1%  
270 normal goat serum for 10 min and washed once with FACS buffer. Serum samples were thawed  
271 on ice and diluted with FACS buffer (1:50 v/v). 50 µL of serum was added to cells for 1 h and  
272 then washed. After that, cells were stained with 10 µg/mL monoclonal mouse anti-devil IgG  
273 antibody (A4-D1-2-1, provided by WEHI)<sup>47</sup> diluted in FACS buffer for 30 min. The cells were  
274 washed and stained with 2 µg/mL goat anti-mouse IgG-Alexa Fluor 647 (# A21235, Thermo  
275 Fisher Scientific) in FACS buffer for 30 min. After washing, cells were fixed in FACS fix  
276 solution and analysed on Cytex™ Aurora. All washing steps include two washes with FACS  
277 buffer unless indicated otherwise and all staining steps were carried out on ice, protected from  
278 light.

## 279 **3. Results**

### 280 **3.1 CIITA plays a dominant role in antigen presentation**

281 To delineate the role of CIITA in DFT cells, differentially expressed genes following stable  
282 expression of CIITA were analysed by gene ontology (GO) functional enrichment analysis.  
283 Differential expression analysis revealed 888 genes, excluding CIITA, that were modulated  
284 ( $|\log_2FC| \geq 2$ , FDR < 0.05) in DFT1.CIITA compared to vector-only cell line DFT1.BFP  
285 (**Figure 1, Supplementary Table 3**). In DFT2.CIITA, there were 56 genes that were  
286 differentially expressed relative to DFT2.BFP. Ten genes were commonly up- or down-

287 regulated by CIITA in DFT1 and DFT2 cells. Most of these genes were of the MHC-II antigen  
288 processing and presentation pathway. *SAHA-DAA*, *SAHA-DAB2* and *SAHA-DAB3* are devil  
289 classical MHC-II genes while *SAHA-DMA* and *SAHA-DMB* encode non-classical MHC-II.  
290 Others include *CD74* and gamma-interferon-inducible lysosomal thiol reductase (*IFI30*),  
291 which encode the invariant chain, an MHC-II chaperone, and an enzyme for lysosomal  
292 degradation of proteins, respectively. Except for *IFI30*, these genes were among the most  
293 highly upregulated genes in the transcriptome of DFT1.CIITA (**Table 2**) and DFT2.CIITA  
294 (**Table 3**).

295 In DFT1.CIITA, several MHC-I heavy chain and accessory genes were strongly induced,  
296 depicting a role of CIITA in MHC-I antigen presentation (**Table 2**). These include: (i) MHC-I  
297 heavy alpha chain genes *SAHA-UA*, *SAHA-UB*, and *SAHA-UC*; and (ii) *B2M*, which associates  
298 with MHC-I alpha chains to form the trimeric structure of MHC-I molecules; (iii) transporter  
299 associated with antigen processing 1 (*TAP1*) for peptide transport into the endoplasmic  
300 reticulum; and (iv) proteasomal subunits *PSMB8* and *PSMB9*.

301 Next, all significantly up- or down-regulated genes were analysed for enriched GO biological  
302 processes using DAVID bioinformatics resource. Thresholds  $p$  value  $< 0.05$  and FDR  $< 0.05$   
303 were applied to filter out insignificant over-represented GO terms. The most significantly  
304 enriched GO biological process in the list of upregulated genes in DFT1.CIITA and  
305 DFT2.CIITA was *antigen processing and presentation* (GO:0019882) followed by *immune*  
306 *response* (GO:0006955) (**Table 4**). Both processes were identified in genes of the MHC-I and  
307 MHC-II machinery (**Supplementary Tables 6 and 7**). *Cell adhesion* (GO:0007155) and *cell*  
308 *communication* (GO:0007154) were enriched in genes downregulated in DFT1.CIITA; there  
309 were no GO biological processes that were associated with downregulated genes in  
310 DFT2.CIITA.

### 311 **3.2 Regulation of MHC-I and MHC-II pathway by CIITA**

312 To further characterise the regulation of MHC-I and MHC-II by CIITA and how it differs from  
313 IFNG or NLRC5 stimulation, a heatmap was used to display the relative expression of MHC-  
314 I and MHC-II genes, and key accessory proteins between the different treatments. The  
315 transcriptome of IFNG-treated DFT2 cells was previously carried out on DFT2 cell line RV  
316 (DFT2.WT<sup>RV</sup>)<sup>27</sup> while subsequent experiments on DFT2 cells were performed using DFT2 cell  
317 line JV (DFT2.WT). Schwann cell differentiation marker SRY-box 10 (*SOX10*) and

318 neuroepithelial marker nestin (*NES*) were used as internal gene controls, and myelin protein  
319 periaxin (*PRX*) was used to discriminate DFT1 cells from DFT2.

320 As described above, CIITA induced the transcription of *B2M*; MHC-I heavy chains *SAHA-UA*,  
321 *-UB*, *-UC*; *PSBM8*; *PSMB9*; and *TAP1* in DFT1 cells. There was also an upregulation of non-  
322 classical MHC-I *SAHA-UK*, and downregulation of *NLRC5* and proteasomal subunit *PSBM10*  
323 in DFT1.CIITA cells (**Figure 2**). Excluding *NLRC5*, genes that were modulated in  
324 DFT1.CIITA were synonymously up- or down-regulated in DFT1.NLRC5, suggesting similar  
325 roles of CIITA to NLRC5 in DFT1 cells. However, induction of the MHC-I pathway by CIITA  
326 was not as strong as NLRC5 despite having similarly high levels of expression in the respective  
327 cell lines (**Figure 2, Supplementary Table 3**). IFNG exhibited a wider range in regulation of  
328 genes from the MHC-I pathway compared to NLRC5 and CIITA. Peptide transporter *TAP2*  
329 and MHC-I chaperone TAP binding protein (*TAPBP*) were exclusively upregulated by IFNG  
330 in DFT1 and DFT2 cells. Meanwhile, the expression of CIITA in DFT2 cells did not appear to  
331 significantly influence any of the MHC-I machinery.

332 High levels of CIITA transcripts in DFT1.CIITA was correlated with strong induction of all  
333 the MHC-II genes, with *SAHA-DAB\_X1* and *SAHA-DAB\_X2* being the weakest. This was not  
334 observed in the other cell lines nor in DFT2.CIITA. CIITA was expressed to a lesser extent in  
335 DFT2.CIITA relative to DFT1.CIITA, and all MHC-II genes but *SAHA-DAB\_X1* and *SAHA-*  
336 *DAB\_X2* were upregulated. The expression of *CIITA*, MHC-II genes and *CD74* was relatively  
337 low in DFT1.WT and DFT2.WT cells except for *SAHA-DAB2* and *SAHA-DAB3* in DFT1.WT.  
338 There was a moderate increase in CIITA expression after IFNG treatment in DFT1 cells, but it  
339 was insufficient to initiate transcription of MHC-II genes or *CD74*. In IFNG-treated DFT2 cells  
340 where CIITA was induced to a higher degree, there was only partial activation of the MHC-II  
341 gene set (*SAHA-DAA*, *SAHA-DMA*, *SAHA-DMB*), and an upregulation of *CD74*. Interestingly,  
342 MHC-II protease cathepsin *CTSS* was only induced with IFNG treatment in DFT1 and DFT2  
343 cells.

### 344 **3.3 MHC-I and MHC-II molecules are upregulated by CIITA in DFT cells**

345 MHC-II (HLA-DRA) protein expression was absent in wild type (WT) DFT1 and DFT2 cells  
346 and in vector-only transfected cells (BFP) but was significantly upregulated in CIITA-  
347 expressing DFT1 cells (**Figure 3A**). In DFT2 cells, the overexpression of CIITA did not alter  
348 median MHC-II expression, or more specifically MHC-II gene loci HLA-DRA. Neither IFNG  
349 treatment nor NLRC5 overexpression induced MHC-II protein expression in DFT1 and DFT2

350 cells. CIITA was capable of restoring surface expression of B2M in DFT1 cells, albeit to a  
351 lesser degree than NLRC5 and IFNG stimulation, consistent with the transcriptomic results  
352 (**Figure 3A, Figure 2**). Meanwhile the basal expression of B2M in DFT2 cells was enhanced  
353 slightly by CIITA.

354 In agreement with an increase in surface B2M expression on DFT1.CIITA by flow cytometry,  
355 an upregulation of MHC-I heavy chains was detected by western blot compared to wild type  
356 (DFT1.WT) and vector-only cells (DFT1.BFP) (**Figure 3B**). IFNG-treated and NLRC5-  
357 overexpressing DFT1 and DFT2 cells also expressed elevated levels of MHC-I heavy chains.  
358 Although flow cytometry detected an increase in B2M expression on DFT2.CIITA, the  
359 expression of MHC-I heavy chains by western blot was similar to DFT2.WT and DFT2.BFP.

### 360 **3.4 Analysis of anti-DFT serum antibody response against CIITA-induced** 361 **antigens**

362 We have previously shown that MHC-I on DFT1 cells is the predominant antibody target in  
363 devils with natural and induced anti-DFT immune response including tumour regressions<sup>8</sup>.  
364 Here we tested if expression of CIITA in DFT cells could also upregulate antibody targets on  
365 DFT cells. Four devils (My, TD4, TD5, TD6) that developed DFT1 tumours and subsequent  
366 serum antibodies (immune) that bound MHC-I were selected for screening against CIITA-  
367 expressing DFT1 and DFT2 cells. Serum from each devil prior to DFT1 infection or observable  
368 DFT1 tumours (pre-immune) was included to assess the change in antibody levels after DFT1  
369 infection.

370 Relative to MHC-I negative DFT1.WT and DFT1.BFP, serum antibodies from all four devils  
371 post-DFT1 development generally showed higher binding to DFT1 cells overexpressing  
372 NLRC5 (**Figure 4**). Antibody levels against CIITA-expressing DFT1 cells were higher than  
373 DFT1.WT and DFT1.BFP in immune sera from My, a captive devil with an immunotherapy-  
374 induced DFT1 regression, and TD4, a wild devil with a natural DFT1 regression. Binding of  
375 serum antibodies to DFT1.CIITA cells was relatively lower than DFT1.NLRC5. There was no  
376 increase in antibody binding towards DFT1.CIITA compared to DFT1.WT and DFT1.BFP  
377 from immune sera of devils TD5 and TD6.

378 Serum from DFT1-infected devils reacted with DFT2 cells but only following NLRC5  
379 overexpression. Serum from My, TD4, TD5 and TD6 all had strong antibody binding to  
380 DFT2.NLRC5 which was not observed in the other DFT2 cell lines. This suggests that NLRC5  
381 upregulates similar antigenic target(s) in DFT1 and DFT2 cells.

## 382 4. Discussion

383 Clonally transmissible cancers in nature are rare, and yet the Tasmanian devils are affected by  
384 two of the only three known naturally occurring transmissible cancers in vertebrates. In a  
385 cancer where allogeneity exists between individual host tissues and tumour, allogeneic MHC  
386 molecules on tumour cells are important targets for anti-tumour immunity. MHC-I expression  
387 on DFT1 cells has been exploited for vaccine development and immunotherapy to enhance  
388 anti-DFT immunity via CD8<sup>+</sup> T cell responses<sup>9</sup>. In this study, we showed that the class II  
389 transactivator CIITA can modulate MHC-I and MHC-II antigen processing and presentation  
390 pathways in DFT cells. Surprisingly, the overexpression of CIITA resulted in upregulation of  
391 MHC-I and MHC-II molecules in DFT1 cells but not DFT2 cells.

392 MHC-II expression is normally confined to a subset of haematopoietic antigen-presenting cells,  
393 and DFT1 and DFT2 cells do not typically express MHC-II genes and proteins. We  
394 demonstrated the expression of MHC-II proteins in non-haematopoietic DFT1 cells through  
395 CIITA-induced upregulation of classical and non-classical MHC-II genes, and the invariant  
396 chain *CD74*. The lack of detectable MHC-II proteins in CIITA-expressing DFT2 cells could  
397 be due to insufficient expression of MHC-II genes and *CD74* for stable expression of MHC-II  
398 molecules. Post-transcriptional regulation might be involved in MHC-II expression in DFT  
399 cells, as described in human T cells<sup>48</sup>. However, the regulation of MHC-II expression by CIITA  
400 in a quantitative (and qualitative) manner, in which CIITA is the rate-determining factor for  
401 mRNA and protein expression of MHC-II genes<sup>49</sup>, suggests a correlation between lack of  
402 MHC-II protein expression and the relatively low CIITA expression in DFT2.CIITA compared  
403 to DFT1.CIITA. A heterozygous non-synonymous mutation (D59N) in transcription factor  
404 *RFX5* is present in DFT2 tumours<sup>6</sup>. *RFX5* is a transcription factor of the multiprotein MHC  
405 enhanceosome that regulates MHC-I and MHC-II expression<sup>50,51</sup>. Although transcription of  
406 MHC-I and MHC-II genes were inducible in DFT2 cells following stimulation, the functional  
407 impact of this mutation on MHC transcription remains to be explored.

408 Differential expression of MHC-II allotypes upon CIITA induction, as observed with *SAHA-*  
409 *DAB\_X1* and *SAHA-DAB\_X2* that were consistently expressed at lower levels compared to  
410 other MHC-II genes, suggests additional regulatory mechanism(s) that control the expression  
411 of MHC-II genes beyond that of CIITA. Variations in expression levels of MHC-I and MHC-  
412 II genes have been associated with sequence polymorphism in the promoter or 3' untranslated  
413 region (UTR) of MHC genes, which modulates transcription either epigenetically or non-

414 epigenetically, in addition to post-transcriptional regulation<sup>52-54</sup>. The varying degrees of  
415 inducibility and expression of devil MHC-II allotypes could correlate to tissue-specific  
416 expression, with functions that differ from classical MHC-II genes.

417 Consistent with findings from pioneering studies on CIITA function<sup>20,21</sup>, CIITA exhibited  
418 transcriptional activity over the MHC-I pathway in DFT1 cells that lack MHC-I expression.  
419 The ability of CIITA to regulate MHC-I expression is attributed to similarities in the regulatory  
420 elements at the proximal promoters of MHC-I and MHC-II genes, and interaction with the  
421 same transcription factors of the MHC enhanceosome as NLRC5<sup>20,21,51,55,56</sup>. In MHC-I positive  
422 DFT2 cells, overexpression of CIITA resulted in minimal upregulation of MHC-I compared  
423 with NLRC5 or IFNG stimulation. The limited CIITA influence on MHC-I expression is  
424 commonly observed in cells with high constitutive levels of MHC-I<sup>20,21</sup>. This illustrates the  
425 role of NLRC5 as the primary transactivator for MHC-I expression and a secondary role for  
426 CIITA.

427 Unlike the ubiquitous expression of MHC-I molecules in nucleated cells, MHC-II expression  
428 is tightly regulated in a cell type-, differentiation-, and stimulus-specific manner. Evidence for  
429 inducibility of MHC-II expression in DFT cells suggests that MHC-II-restricted tumour  
430 antigen presentation could occur in the physiological setting under inflammatory conditions  
431 that upregulate CIITA. This could provide additional targets for allogeneic antibody responses,  
432 as our results show that CIITA upregulation increases binding of serum antibodies collected  
433 from devils that had both natural and immunotherapy-induced DFT1 regressions. In canine  
434 transmissible venereal tumour (CTVT), the tumour regression phase is often associated with  
435 upregulation of MHC-I and MHC-II molecules, mediated by factors such as IFNG from tumour  
436 infiltrating lymphocytes<sup>57,58</sup>.

437 The capacity to express MHC-II molecules with CIITA expression could stem from the  
438 Schwann cell origins of DFT1 and DFT2 cells<sup>27,59</sup>. Schwann cells express MHC-II molecules  
439 upon traumatic and inflammatory injury, playing a role in antigen presentation to CD4<sup>+</sup> T cells  
440 to modulate local immune responses<sup>60,61</sup>. Similarly, CIITA-expressing DFT cells have the  
441 potential to present MHC-II-restricted tumour antigens to CD4<sup>+</sup> T cells and potentiate anti-  
442 DFT immune responses. Several studies in murine models have demonstrated immune-  
443 mediated tumour rejection and/or tumour growth retardation using MHC-II-expressing tumour  
444 cell lines, either through CIITA or MHC-II gene transfer<sup>62-67</sup>. These primary responses were  
445 also protective against subsequent challenge with parental MHC-II negative tumours. The



446 expression of MHC-II on CIITA-expressing DFT cells can offer insight into the importance of  
447 CD4<sup>+</sup> T cells in the interplay with other immune cells for anti-tumour immunity and allograft  
448 rejection.

449 In this study, the role of CIITA as the master regulator of MHC-II expression was reaffirmed  
450 in a non-model immunology research species. We have delineated the regulation of MHC-I  
451 and MHC-II pathways by CIITA in marsupials and transmissible cancers. The ability to induce  
452 MHC-II expression in transmissible tumour cells creates an avenue for vaccine and  
453 immunotherapeutic strategies to enhance anti-tumour immunity through CD4<sup>+</sup> T cell help and  
454 inform of the importance of MHC-II in anti-tumour and allogeneic immune responses. The  
455 relatively simple process we developed for making cell lines that constitutively express NLRC5  
456 and CIITA can be readily adapted for many other species and potentially be used in conjunction  
457 with CD80/CD86 to provide antigen stimulation in *in vitro* assays. This is critical for 99% of  
458 species that lack reagents, such as agonistic anti-CD3 and anti-CD28 antibodies, for inducing  
459 T cell activation *in vitro*.

## 460 **Declaration of competing interest**

461 The authors declare that the research was conducted in the absence of any commercial or  
462 financial relationships that could be construed as a potential conflict of interest.

## 463 **Funding**

464 This work was supported by the Australian Research Council (ARC) DECRA grant #  
465 DE180100484 and ARC Discovery grant # DP180100520, University of Tasmania Foundation  
466 Dr. Eric Guiler Tasmanian Devil Research Grant through funds raised by the Save the  
467 Tasmanian Devil Appeal (2013, 2015, 2017).

## 468 **Authors' contributions**

469 ABL, ASF, CEBO and GMW designed the study. ASF and CEBO developed the technology.  
470 CEBO performed the experiments and bioinformatic analyses. CEBO created the figures. ABL,  
471 ASF, CEBO, GMW, HVS and YC analysed and interpreted the data. CEBO wrote the  
472 manuscript, and all authors edited the manuscript.

## 473 **Acknowledgements**

474 The authors would like to thank Jocelyn Darby and Alana De Luca for assistance in the lab,  
475 Terry Pinfold for assistance in flow cytometry, and Amanda Patchett for assistance in  
476 bioinformatic analysis. We wish to thank G. Ralph for ongoing care of Tasmanian devils, the

477 Bonorong Wildlife Sanctuary for providing access to Tasmanian devils, and R. Pye for  
478 providing care for devils and collecting blood samples.

## 479 **References**

- 480 1 Cunningham CX, Comte S, McCallum H, Hamilton DG, Hamede R, Storfer A *et al.*  
481 Quantifying 25 years of disease-caused declines in Tasmanian devil populations: host  
482 density drives spatial pathogen spread. *Ecol Lett* 2021; **24**: 958–969.
- 483 2 Pearse A-M, Swift K. Allograft theory: Transmission of devil facial-tumour disease.  
484 *Nature* 2006; **439**: 549.
- 485 3 Pye RJ, Pemberton D, Tovar C, Tubio JMC, Dun KA, Fox S *et al.* A second  
486 transmissible cancer in Tasmanian devils. *Proc Natl Acad Sci U S A* 2016; **113**: 374–  
487 379.
- 488 4 Siddle H V, Kreiss A, Eldridge MDB, Noonan E, Clarke CJ, Pyecroft S *et al.*  
489 Transmission of a fatal clonal tumor by biting occurs due to depleted MHC diversity in  
490 a threatened carnivorous marsupial. *Proc Natl Acad Sci U S A* 2007; **104**: 16221–6.
- 491 5 Siddle H V, Kreiss A, Tovar C, Yuen CK, Cheng Y, Belov K *et al.* Reversible  
492 epigenetic down-regulation of MHC molecules by devil facial tumour disease  
493 illustrates immune escape by a contagious cancer. *Proc Natl Acad Sci U S A* 2013;  
494 **110**: 5103–5108.
- 495 6 Stammnitz MR, Coorens THH, Gori KC, Hayes D, Fu B, Wang J *et al.* The Origins  
496 and Vulnerabilities of Two Transmissible Cancers in Tasmanian Devils. *Cancer Cell*  
497 2018; **33**: 607-619.e15.
- 498 7 Pye R, Hamede R, Siddle H V., Caldwell A, Knowles GW, Swift K *et al.*  
499 Demonstration of immune responses against devil facial tumour disease in wild  
500 Tasmanian devils. *Biol Lett* 2016; **12**: 20160553.
- 501 8 Ong CEB, Patchett AL, Darby JM, Chen J, Liu G-S, Lyons AB *et al.* NLRC5 regulates  
502 expression of MHC-I and provides a target for anti-tumor immunity in transmissible  
503 cancers. *J Cancer Res Clin Oncol* 2021; : 1–19.
- 504 9 Tovar C, Pye RJ, Kreiss A, Cheng Y, Brown GK, Darby J *et al.* Regression of devil  
505 facial tumour disease following immunotherapy in immunised Tasmanian devils. *Sci*  
506 *Rep* 2017; **7**: 43827.
- 507 10 Caldwell A, Coleby R, Tovar C, Stammnitz MR, Kwon YM, Owen RS *et al.* The  
508 newly-arisen Devil facial tumour disease 2 (DFT2) reveals a mechanism for the  
509 emergence of a contagious cancer. *Elife* 2018; **7**: e35314.
- 510 11 Hung K, Hayashi R, Lafond-Walker A, Lowenstein C, Pardoll D, Levitsky H. The  
511 central role of CD4+ T cells in the antitumor immune response. *J Exp Med* 1998; **188**:  
512 2357–2368.
- 513 12 Janssen EM, Lemmens EE, Wolfe T, Christen U, Von Herrath MG, Schoenberger SP.  
514 CD4+ T cells are required for secondary expansion and memory in CD8+ T  
515 lymphocytes. *Nature* 2003; **421**: 852–856.
- 516 13 Kumamoto Y, Mattei LM, Sellers S, Payne GW, Iwasaki A. CD4+ T cells support  
517 cytotoxic T lymphocyte priming by controlling lymph node input. *Proc Natl Acad Sci*  
518 *U S A* 2011; **108**: 8749–8754.

- 519 14 Bennett SRM, Carbone FR, Karamalis F, Flavell RA, Miller JFAP, Heath WR. Help  
520 for cytotoxic-T-cell responses is mediated by CD40 signalling. *Nature* 1998; **393**:  
521 478–480.
- 522 15 Dalloul AH, Chmouzis E, Ngo K, Fung-Leung WP. Adoptively transferred CD4+  
523 lymphocytes from CD8 -/- mice are sufficient to mediate the rejection of MHC class II  
524 or class I disparate skin grafts. *J Immunol* 1996; **156**: 4114–4119.
- 525 16 Krieger NR, Yin DP, Fathman CG. CD4+ but not CD8+ cells are essential for  
526 allorejection. *J Exp Med* 1996; **184**: 2013–2018.
- 527 17 Propper DJ, Chao D, Braybrooke JP, Bahl P, Thavasu P, Balkwill F *et al.* Low-Dose  
528 IFN- $\gamma$  Induces Tumor MHC Expression in Metastatic Malignant Melanoma. *Clin*  
529 *Cancer Res* 2003; **9**: 84–92.
- 530 18 Steimle V, Otten LA, Zufferey M, Mach B. Complementation cloning of an MHC  
531 class II transactivator mutated in hereditary MHC class II deficiency (or bare  
532 lymphocyte syndrome). *Cell* 1993; **75**: 135–146.
- 533 19 Steimle V, Siegrist CA, Mottet A, Lisowska-Grospierre B, Mach B. Regulation of  
534 MHC class II expression by interferon- $\gamma$  mediated by the transactivator gene CIITA.  
535 *Science* (80- ) 1994; **265**: 106–109.
- 536 20 Gobin SJP, Peijnenburg A, Keijsers V, Van Den Elsen PJ. Site  $\alpha$  is crucial for two  
537 routes of IFN $\gamma$ -induced MHC class I transactivation: the ISRE-mediated route and a  
538 novel pathway involving CIITA. *Immunity* 1997; **6**: 601–611.
- 539 21 Martin BK, Chin KC, Olsen JC, Skinner CA, Dey A, Ozato K *et al.* Induction of MHC  
540 class I expression by the MHC class II transactivator CIITA. *Immunity* 1997; **6**: 591–  
541 600.
- 542 22 Pearse A-M, Swift K, Hodson P, Hua B, McCallum H, Pyecroft S *et al.* Evolution in a  
543 transmissible cancer: a study of the chromosomal changes in devil facial tumor (DFT)  
544 as it spreads through the wild Tasmanian devil population. *Cancer Genet* 2012; **205**:  
545 101–112.
- 546 23 Kowarz E, Löscher D, Marschalek R. Optimized Sleeping Beauty transposons rapidly  
547 generate stable transgenic cell lines. *Biotechnol J* 2015; **10**: 647–653.
- 548 24 Flies AS, Darby JM, Murphy PR, Pinfeld TL, Patchett AL, Lennard PR. Generation  
549 and Testing of Fluorescent Adaptable Simple Theranostic (FAST) Proteins. *Bio-*  
550 *protocol* 2020; **10**: e3696.
- 551 25 Mátés L, Chuah MKL, Belay E, Jerchow B, Manoj N, Acosta-Sanchez A *et al.*  
552 Molecular evolution of a novel hyperactive Sleeping Beauty transposase enables  
553 robust stable gene transfer in vertebrates. *Nat Genet* 2009; **41**: 753–761.
- 554 26 Patchett AL, Wilson R, Charlesworth JC, Corcoran LM, Papenfuss AT, Lyons BA *et*  
555 *al.* Transcriptome and proteome profiling reveals stress-induced expression signatures  
556 of imiquimod-treated Tasmanian devil facial tumor disease (DFTD) cells. *Oncotarget*  
557 2018; **9**: 15895–15914.
- 558 27 Patchett AL, Coorens THH, Darby J, Wilson R, McKay MJ, Kamath KS *et al.* Two of  
559 a kind: transmissible Schwann cell cancers in the endangered Tasmanian devil  
560 (*Sarcophilus harrisii*). *Cell Mol Life Sci* 2020; **77**: 1847–1858.
- 561 28 Andrews S. FastQC: A Quality Control tool for High Throughput Sequence Data.  
562 2010. doi:<https://www.bioinformatics.babraham.ac.uk/projects/fastqc/>.

- 563 29 Liao Y, Smyth GK, Shi W. The Subread aligner: fast, accurate and scalable read  
564 mapping by seed-and-vote. *Nucleic Acids Res* 2013; **41**: e108–e108.
- 565 30 Liao Y, Smyth GK, Shi W. featureCounts: an efficient general purpose program for  
566 assigning sequence reads to genomic features. *Bioinformatics* 2014; **30**: 923–930.
- 567 31 RStudio Team. RStudio: Integrated Development Environment for R.  
568 2020.<http://www.rstudio.com/>.
- 569 32 R Core Team. R: A Language and Environment for Statistical Computing.  
570 2020.<https://www.r-project.org/>.
- 571 33 Robinson MD, McCarthy DJ, Smyth GK. edgeR: A Bioconductor package for  
572 differential expression analysis of digital gene expression data. *Bioinformatics* 2009;  
573 **26**: 139–140.
- 574 34 Robinson MD, Oshlack A. A scaling normalization method for differential expression  
575 analysis of RNA-seq data. *Genome Biol* 2010; **11**: R25.
- 576 35 Anders S, Huber W. Differential expression analysis for sequence count data. *Genome*  
577 *Biol* 2010; **11**: R106.
- 578 36 Bullard JH, Purdom E, Hansen KD, Dudoit S. Evaluation of statistical methods for  
579 normalization and differential expression in mRNA-Seq experiments. *BMC*  
580 *Bioinformatics* 2010; **11**: 94.
- 581 37 Risso D, Schwartz K, Sherlock G, Dudoit S. GC-Content Normalization for RNA-Seq  
582 Data. *BMC Bioinformatics* 2011; **12**: 480.
- 583 38 Law CW, Chen Y, Shi W, Smyth GK. voom: Precision weights unlock linear model  
584 analysis tools for RNA-seq read counts. *Genome Biol* 2014; **15**: R29.
- 585 39 Ritchie ME, Phipson B, Wu D, Hu Y, Law CW, Shi W *et al.* *limma* powers differential  
586 expression analyses for RNA-sequencing and microarray studies. *Nucleic Acids Res*  
587 2015; **43**: e47.
- 588 40 Phipson B, Lee S, Majewski IJ, Alexander WS, Smyth GK. Robust hyperparameter  
589 estimation protects against hypervariable genes and improves power to detect  
590 differential expression. *Ann Appl Stat* 2016; **10**: 946–963.
- 591 41 Oliveros JC. Venny. An interactive tool for comparing lists with Venn’s diagrams.  
592 2015.<https://bioinfogp.cnb.csic.es/tools/venny/index.html>.
- 593 42 Gu Z, Eils R, Schlesner M. Complex heatmaps reveal patterns and correlations in  
594 multidimensional genomic data. *Bioinformatics* 2016; **32**: 2847–2849.
- 595 43 Huang DW, Sherman BT, Lempicki RA. Bioinformatics enrichment tools: Paths  
596 toward the comprehensive functional analysis of large gene lists. *Nucleic Acids Res*  
597 2009; **37**: 1–13.
- 598 44 Huang DW, Sherman BT, Lempicki RA. Systematic and integrative analysis of large  
599 gene lists using DAVID bioinformatics resources. *Nat Protoc* 2009; **4**: 44–57.
- 600 45 Cheng Y, Stuart A, Morris K, Taylor R, Siddle H, Deakin J *et al.* Antigen-presenting  
601 genes and genomic copy number variations in the Tasmanian devil MHC. *BMC*  
602 *Genomics* 2012; **13**: 87.
- 603 46 Flies AS, Lyons AB, Corcoran LM, Papenfuss AT, Murphy JM, Knowles GW *et al.*  
604 PD-L1 is not constitutively expressed on Tasmanian devil facial tumor cells but is  
605 strongly upregulated in response to IFN- $\gamma$  and can be expressed in the tumor

- 606 microenvironment. *Front Immunol* 2016; **7**: 581.
- 607 47 Howson LJ, Morris KM, Kobayashi T, Tovar C, Kreiss A, Papenfuss AT *et al*.  
608 Identification of dendritic cells, B cell and T cell subsets in Tasmanian devil lymphoid  
609 tissue; evidence for poor immune cell infiltration into devil facial tumors. *Anat Rec*  
610 (*Hoboken*) 2014; **297**: 925–938.
- 611 48 Caplen HS, Salvadori S, Gansbacher B, Zier KS. Post-transcriptional regulation of  
612 MHC class II expression in human T cells. *Cell Immunol* 1992; **139**: 98–107.
- 613 49 Otten LA, Steimle V, Bontron S, Mach B. Quantitative control of MHC class II  
614 expression by the transactivator CIITA. *Eur J Immunol* 1998; **28**: 473–478.
- 615 50 Gobin SJP, Peijnenburg A, Van Eggermond M, Van Zutphen M, Van Den Berg R,  
616 Van Den Elsen PJ. The RFX complex is crucial for the constitutive and CIITA-  
617 mediated transactivation of MHC class I and  $\beta_2$ -microglobulin genes. *Immunity* 1998;  
618 **9**: 531–541.
- 619 51 Masternak K, Muhlethaler-Mottet A, Villard J, Zufferey M, Steimle V, Reith W.  
620 CIITA is a transcriptional coactivator that is recruited to MHC class II promoters by  
621 multiple synergistic interactions with an enhanceosome complex. *Genes Dev* 2000; **14**:  
622 1156–1166.
- 623 52 Leen MPJM, Gorski J. Differential expression of isomorphic HLA-DR $\beta$  genes is not a  
624 sole function of transcription. *Hum Immunol* 1996; **50**: 111–120.
- 625 53 Kulkarni S, Savan R, Qi Y, Gao X, Yuki Y, Bass SE *et al*. Differential microRNA  
626 regulation of HLA-C expression and its association with HIV control. *Nature* 2011;  
627 **472**: 495–498.
- 628 54 Andersen LC, Beaty JS, Nettles JW, Seyfried CE, Nepom GT, Nepom BS. Allelic  
629 polymorphism in transcriptional regulatory regions of HLA-DQB genes. *J Exp Med*  
630 1991; **173**: 181–192.
- 631 55 Gobin SJP, van Zutphen M, Westerheide SD, Boss JM, van den Elsen PJ. The MHC-  
632 specific enhanceosome and its role in MHC class I and  $\beta_2$ -microglobulin gene  
633 transactivation. *J Immunol* 2001; **167**: 5175–5184.
- 634 56 Meissner TB, Liu Y-J, Lee K-H, Li A, Biswas A, van Eggermond MCJA *et al*.  
635 NLRC5 cooperates with the RFX transcription factor complex to induce MHC class I  
636 gene expression. *J Immunol* 2012; **188**: 4951–4958.
- 637 57 Hsiao YW, Liao KW, Hung SW, Chu RM. Effect of tumor infiltrating lymphocytes on  
638 the expression of MHC molecules in canine transmissible venereal tumor cells. *Vet*  
639 *Immunol Immunopathol* 2002; **87**: 19–27.
- 640 58 Hsiao Y-W, Liao K-W, Chung T-F, Liu C-H, Hsu C-D, Chu R-M. Interactions of host  
641 IL-6 and IFN- $\gamma$  and cancer-derived TGF- $\beta$ 1 on MHC molecule expression during  
642 tumor spontaneous regression. *Cancer Immunol Immunother* 2008; **57**: 1091–1104.
- 643 59 Murchison EP, Tovar C, Hsu A, Bender HS, Kheradpour P, Rebbeck CA *et al*. The  
644 Tasmanian devil transcriptome reveals Schwann cell origins of a clonally transmissible  
645 cancer. *Science* 2010; **327**: 84–87.
- 646 60 Meyer zu Hörste G, Heidenreich H, Lehmann HC, Ferrone S, Hartung HP, Wiendl H  
647 *et al*. Expression of antigen processing and presenting molecules by Schwann cells in  
648 inflammatory neuropathies. *Glia* 2010; **58**: 80–92.
- 649 61 Meyer zu Hörste G, Heidenreich H, Mausberg AK, Lehmann HC, ten Asbroek



- 650 ALMA, Saavedra JT *et al.* Mouse Schwann cells activate MHC class I and II restricted  
651 T-cell responses, but require external peptide processing for MHC class II  
652 presentation. *Neurobiol Dis* 2010; **37**: 483–490.
- 653 62 Meazza R, Comes A, Orenzo AM, Ferrini S, Accolla RS. Tumor rejection by gene  
654 transfer of the MHC class II transactivator in murine mammary adenocarcinoma cells.  
655 *Eur J Immunol* 2003; **33**: 1183–1192.
- 656 63 Mortara L, Frangione V, Castellani P, De Lerma Barbaro A, Accolla RS. Irradiated  
657 CIITA-positive mammary adenocarcinoma cells act as a potent anti-tumor-preventive  
658 vaccine by inducing tumor-specific CD4<sup>+</sup> T cell priming and CD8<sup>+</sup> T cell effector  
659 functions. *Int Immunol* 2009; **21**: 655–665.
- 660 64 Frangione V, Mortara L, Castellani P, De Lerma Barbaro A, Accolla RS. CIITA-  
661 driven MHC-II positive tumor cells: Preventive vaccines and superior generators of  
662 antitumor CD4<sup>+</sup> T lymphocytes for immunotherapy. *Int J Cancer* 2010; **127**: 1614–  
663 1624.
- 664 65 Ekkirala CR, Cappello P, Accolla RS, Giovarelli M, Romero I, Garrido C *et al.* Class  
665 II Transactivator-Induced MHC Class II Expression in Pancreatic Cancer Cells Leads  
666 to Tumor Rejection and a Specific Antitumor Memory Response. *Pancreas* 2014; **43**:  
667 1066–1072.
- 668 66 Ostrand-Rosenberg S, Clements VK, Thakur A, Cole GA. Transfection of major  
669 histocompatibility complex class I and class II genes causes tumour rejection. *Int J*  
670 *Immunogenet* 1989; **16**: 343–349.
- 671 67 Ostrand-Rosenberg S, Thakur A, Clements V. Rejection of mouse sarcoma cells after  
672 transfection of MHC class II genes. *J Immunol* 1990; **144**: 4068–4071.



673 **Tables**

674 Table 1. List of all devil facial tumour (DFT) cell lines and treatments

| ID # | Sample name                  | Parent cell line | Treatment                              | References              | ENA project # |
|------|------------------------------|------------------|----------------------------------------|-------------------------|---------------|
| 1    | DFT1.WT                      | DFT1 C5065       | Untreated                              | Patchett et al., (2018) | PRJNA416378   |
| 2    | DFT2.WT <sup>RV</sup>        | DFT2 RV          | Untreated                              | Patchett et al., (2020) | PRJEB28680    |
| 3    | DFT2.WT                      | DFT2 JV          | Untreated                              | Ong et al., (2021)      | PRJEB39847    |
| 4    | DFT1.WT + IFNG               | DFT1 C5065       | 5 ng/mL IFNG, 24h                      | Ong et al., (2021)      | PRJEB39847    |
| 5    | DFT2.WT <sup>RV</sup> + IFNG | DFT2 RV          | 5 ng/mL IFNG, 24h                      | Ong et al., (2021)      | PRJEB39847    |
| 6    | DFT1.BFP                     | DFT1 C5065       | Transfected with empty vector pSBbi-BH | Ong et al., (2021)      | PRJEB39847    |
| 7    | DFT2.BFP                     | DFT2 JV          | Transfected with empty vector pSBbi-BH | Ong et al., (2021)      | PRJEB39847    |
| 8    | DFT1.NLRC5                   | DFT1 C5065       | Transfected with NLRC5 vector pCO1     | Ong et al., (2021)      | PRJEB39847    |
| 9    | DFT2.NLRC5                   | DFT2 JV          | Transfected with NLRC5 vector pCO1     | Ong et al., (2021)      | PRJEB39847    |
| 10   | DFT1.CIITA                   | DFT1 C5065       | Transfected with CIITA vector pCO2     | This study              | PRJEB45867    |
| 11   | DFT2.CIITA                   | DFT2 JV          | Transfected with CIITA vector pCO2     | This study              | PRJEB45867    |

675

676 Table 2. Top 20 most significantly upregulated genes in DFT1.CIITA

| Gene               | Gene description                                         | MHC pathway | log <sub>2</sub> FC | FDR      |
|--------------------|----------------------------------------------------------|-------------|---------------------|----------|
| <i>SAHA-DAA</i>    | Class II histocompatibility antigen, DA alpha chain      | Class II    | 17.09               | 1.90E-04 |
| <i>CD74</i>        | CD74 molecule                                            | Class II    | 16.39               | 7.77E-05 |
| <i>CIITA</i>       | Class II major histocompatibility complex transactivator | Class II    | 15.40               | 1.07E-04 |
| <i>SAHA-DMB</i>    | Class II histocompatibility antigen, DM beta chain       | Class II    | 10.26               | 7.00E-05 |
| <i>SAHA-DAB_X2</i> | Class II histocompatibility antigen, DA beta chain       | Class II    | 9.04                | 1.11E-03 |
| <i>SAHA-DAB_X1</i> | Class II histocompatibility antigen, DA beta chain       | Class II    | 8.82                | 7.77E-04 |
| <i>PSMB9</i>       | Proteasome 20S subunit beta 9                            | Class I     | 8.52                | 4.08E-04 |
| <i>SAHA-DMA</i>    | Class II histocompatibility antigen, DM alpha chain      | Class II    | 6.52                | 5.12E-04 |
| <i>TAP1</i>        | Transporter 1, ATP binding cassette subfamily B member   | Class I     | 6.46                | 6.95E-04 |
| <i>PSMB8</i>       | Proteasome 20S subunit beta 8                            | Class I     | 6.13                | 1.29E-03 |
| <i>SAHA-DAB3</i>   | Class II histocompatibility antigen, DA beta chain       | Class II    | 6.08                | 7.72E-05 |
| <i>SAHA-UC</i>     | Class I histocompatibility antigen heavy chain           | Class I     | 5.08                | 2.17E-03 |
| <i>SAHA-UA</i>     | Class I histocompatibility antigen heavy chain           | Class I     | 4.77                | 2.29E-03 |
| <i>B2M</i>         | Beta-2-microglobulin                                     | Class I     | 4.43                | 1.96E-05 |
| <i>SAHA-UB</i>     | Class I histocompatibility antigen heavy chain           | Class I     | 4.41                | 2.25E-03 |
| <i>SAHA-DAB2</i>   | Class II histocompatibility antigen, DA beta chain       | Class II    | 4.21                | 1.96E-05 |
| <i>ICOSLG</i>      | Inducible T Cell Costimulator (ICOS) Ligand              | Unrelated   | 3.98                | 1.14E-03 |
| <i>KIF6</i>        | Kinesin family member 6                                  | Unrelated   | 3.88                | 1.10E-02 |
| <i>BARX1</i>       | BARX homeobox 1                                          | Unrelated   | 3.68                | 4.99E-03 |
| <i>MID1</i>        | Midline 1                                                | Unrelated   | 3.67                | 3.52E-03 |

See *Supplementary Table 3* full list of differentially expressed genes and log<sub>2</sub>TPM values.

678 Table 3. Significantly upregulated genes in DFT2.CIITA

| <b>Gene</b>      | <b>Gene description</b>                                  | <b>MHC pathway</b> | <b>log<sub>2</sub>FC</b> | <b>FDR</b> |
|------------------|----------------------------------------------------------|--------------------|--------------------------|------------|
| <i>CD74</i>      | CD74 molecule                                            | Class II           | 13.60                    | 6.69E-03   |
| <i>CIITA</i>     | Class II major histocompatibility complex transactivator | Class II           | 11.50                    | 2.31E-03   |
| <i>SAHA-DAA</i>  | Class II histocompatibility antigen, DA alpha chain      | Class II           | 8.52                     | 2.31E-03   |
| <i>SAHA-DMB</i>  | Class II histocompatibility antigen, DM beta chain       | Class II           | 8.34                     | 2.81E-04   |
| <i>SAHA-DAB3</i> | Class II histocompatibility antigen, DA beta chain       | Class II           | 7.09                     | 2.19E-03   |
| <i>SAHA-DMA</i>  | Class II histocompatibility antigen, DM alpha chain      | Class II           | 6.82                     | 6.82E-04   |
| <i>SAHA-DAB2</i> | Class II histocompatibility antigen, DA beta chain       | Class II           | 4.14                     | 3.10E-04   |
| <i>BTN2A2</i>    | Butyrophilin subfamily 2 member A2                       | Unrelated          | 3.49                     | 3.54E-02   |
| <i>NDUFA4L2</i>  | NDUFA4 mitochondrial complex associated like 2           | Unrelated          | 2.83                     | 2.72E-02   |

*See Supplementary Table 3 full list of differentially expressed genes and log<sub>2</sub>TPM values.*

679

680 Table 4. GO biological processes enriched in differentially expressed genes in DFT1.CIITA  
 681 and DFT2.CIITA

| GO ID                | GO term                             | Count | Term size | Fold enrichment | p value  | FDR      |
|----------------------|-------------------------------------|-------|-----------|-----------------|----------|----------|
| <b>DFT1.CIITA</b>    |                                     |       |           |                 |          |          |
| <i>Upregulated</i>   |                                     |       |           |                 |          |          |
| GO:0019882           | antigen processing and presentation | 8     | 42        | 86.09           | 1.34E-12 | 1.19E-09 |
| GO:0006955           | immune response                     | 9     | 518       | 7.85            | 4.75E-06 | 2.12E-03 |
| <i>Downregulated</i> |                                     |       |           |                 |          |          |
| GO:0007155           | cell adhesion                       | 44    | 719       | 2.14            | 2.27E-06 | 4.48E-03 |
| GO:0022610           | biological adhesion                 | 44    | 721       | 2.13            | 2.44E-06 | 4.48E-03 |
| GO:0023052           | signaling                           | 113   | 2746      | 1.44            | 4.94E-06 | 6.05E-03 |
| GO:0044700           | single organism signaling           | 111   | 2726      | 1.42            | 1.12E-05 | 1.02E-02 |
| GO:0007154           | cell communication                  | 112   | 2773      | 1.41            | 1.46E-05 | 1.07E-02 |
| <b>DFT2.CIITA</b>    |                                     |       |           |                 |          |          |
| <i>Upregulated</i>   |                                     |       |           |                 |          |          |
| GO:0019882           | antigen processing and presentation | 4     | 42        | 215.21          | 9.33E-08 | 3.90E-05 |
| GO:0006955           | immune response                     | 4     | 518       | 17.45           | 1.87E-04 | 3.91E-02 |

682

683 **Figures**

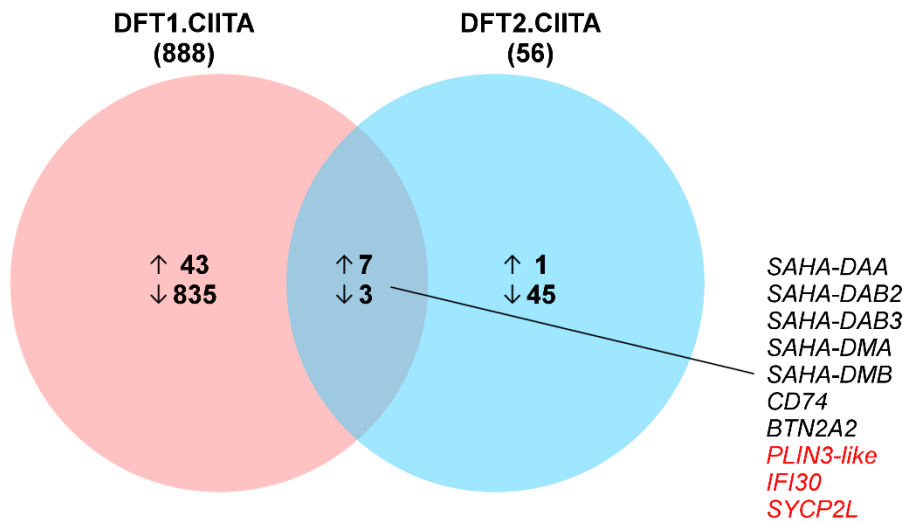

684

685 Figure 1. Venn diagram of differentially expressed genes in DFT1 and DFT2 cells with CIITA  
686 overexpression. Change in gene expression was identified between DFT.CIITA and vector-  
687 only control DFT.BFP. Total number of DEGs is indicated in parenthesis under sample name  
688 and the number of upregulated (↑) and downregulated genes (↓) are described in each Venn  
689 circle. Mutually inclusive genes that were upregulated are indicated in black and  
690 downregulated in red.

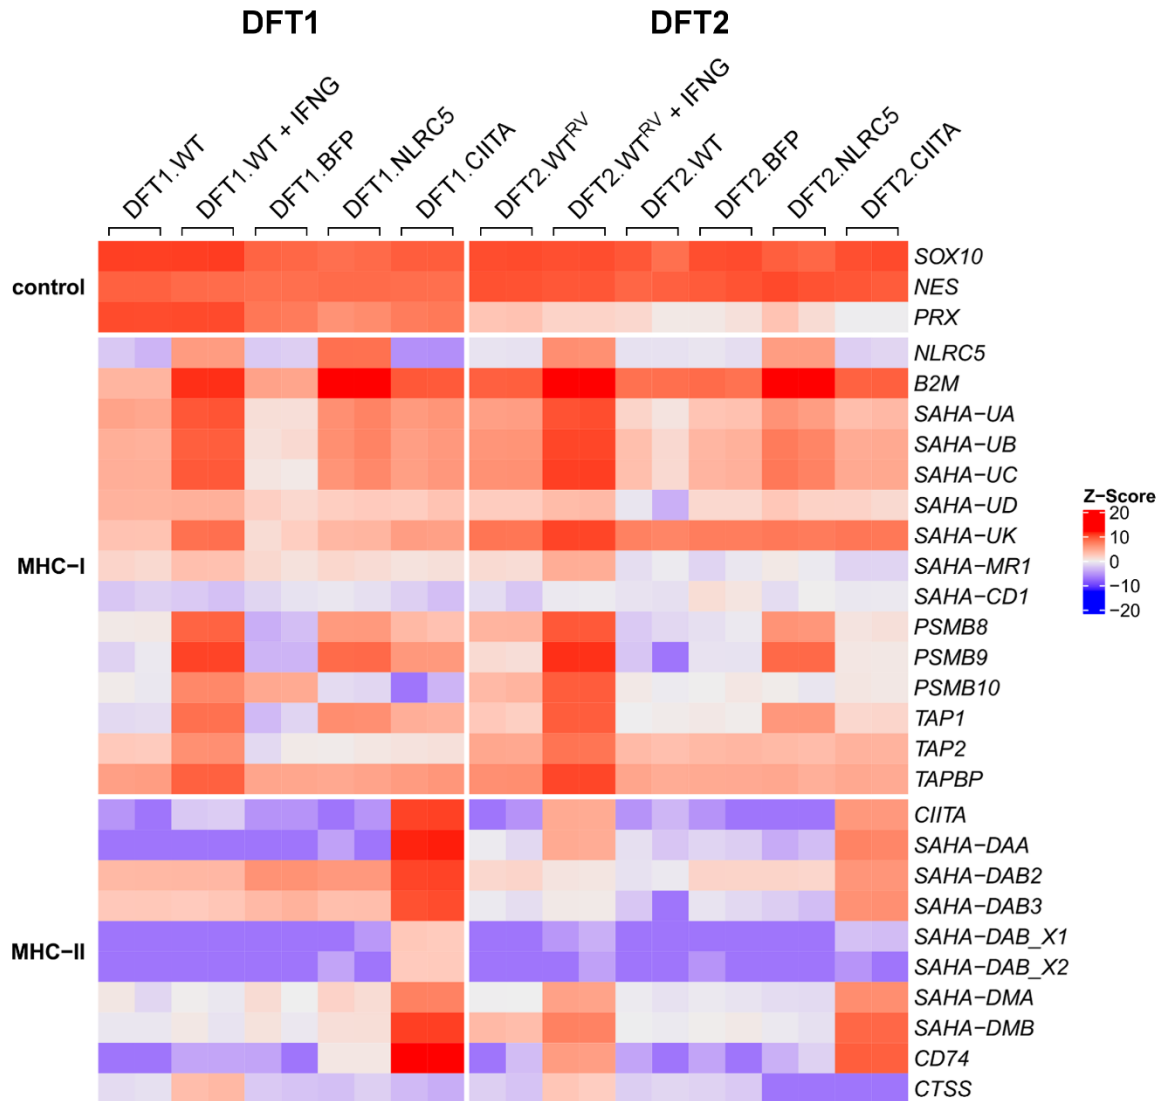

691

692 Figure 2. Heatmap showing relative expression of genes involved in MHC-I and MHC-II  
693 antigen processing and presentation in wild type, IFNG-treated, BFP- (vector control),  
694 NLRC5-, and CIITA-expressing DFT1 and DFT2 cells. Z-scores were calculated from  
695  $\log_2$ TPM expression values and scaled across each gene (rows). High and low relative  
696 expression are represented by red and blue, respectively. Replicates per treatment ( $N=2$ ) are  
697 included in the heatmap.



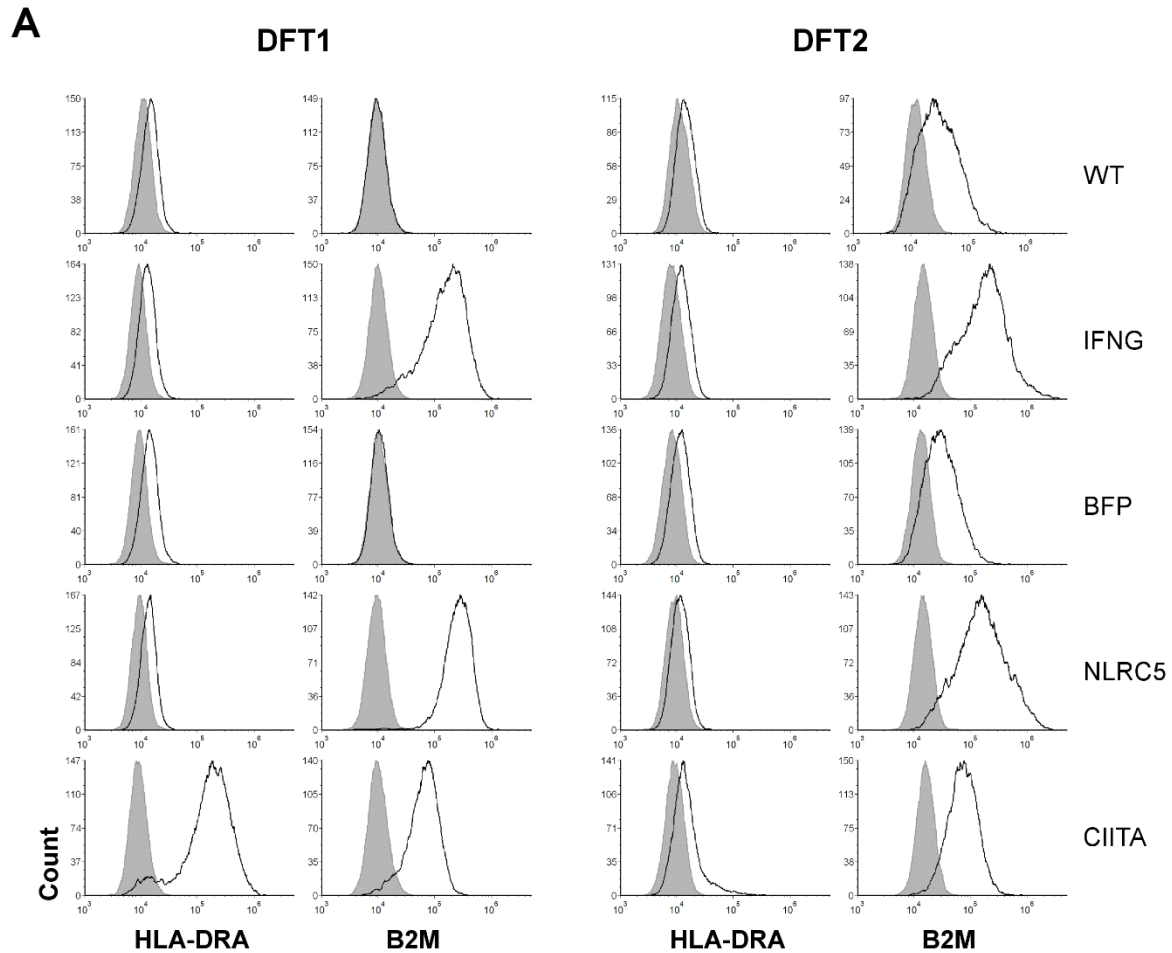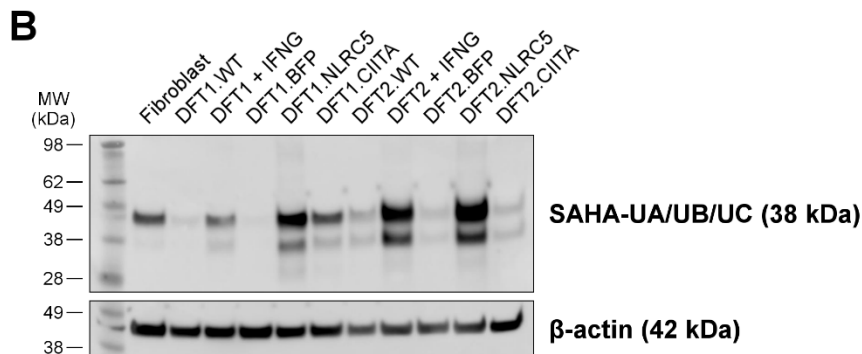

698

699 Figure 3. Expression of MHC-II, B2M and MHC-I in DFT1 and DFT2 cell lines. (A) Wild  
 700 type (WT), IFNG-treated (IFNG), vector-only control (BFP), NLRC5-overexpressing (NLRC5)  
 701 or CIITA-overexpressing (CIITA) DFT1 and DFT2 cells were analysed by flow cytometry for  
 702 B2M and MHC-II expression using antibodies against surface devil B2M or intracellular HLA-  
 703 DR alpha chain (HLA-DRA), respectively (*solid line*). B2M and MHC-II expressions were  
 704 overlaid with a secondary antibody-only control (*shaded area*). The results shown are  
 705 representative of  $N=3$  replicates/treatment. (B) Cell lysate from devil fibroblast, DFT1 and  
 706 DFT2 cell lines was incubated with an antibody against MHC-I heavy chain genes SAHA-  
 707 UA/UB/UC for western blot analysis of MHC-I expression.  $\beta$ -actin was included as a loading  
 708 control. *MW*, molecular weight.

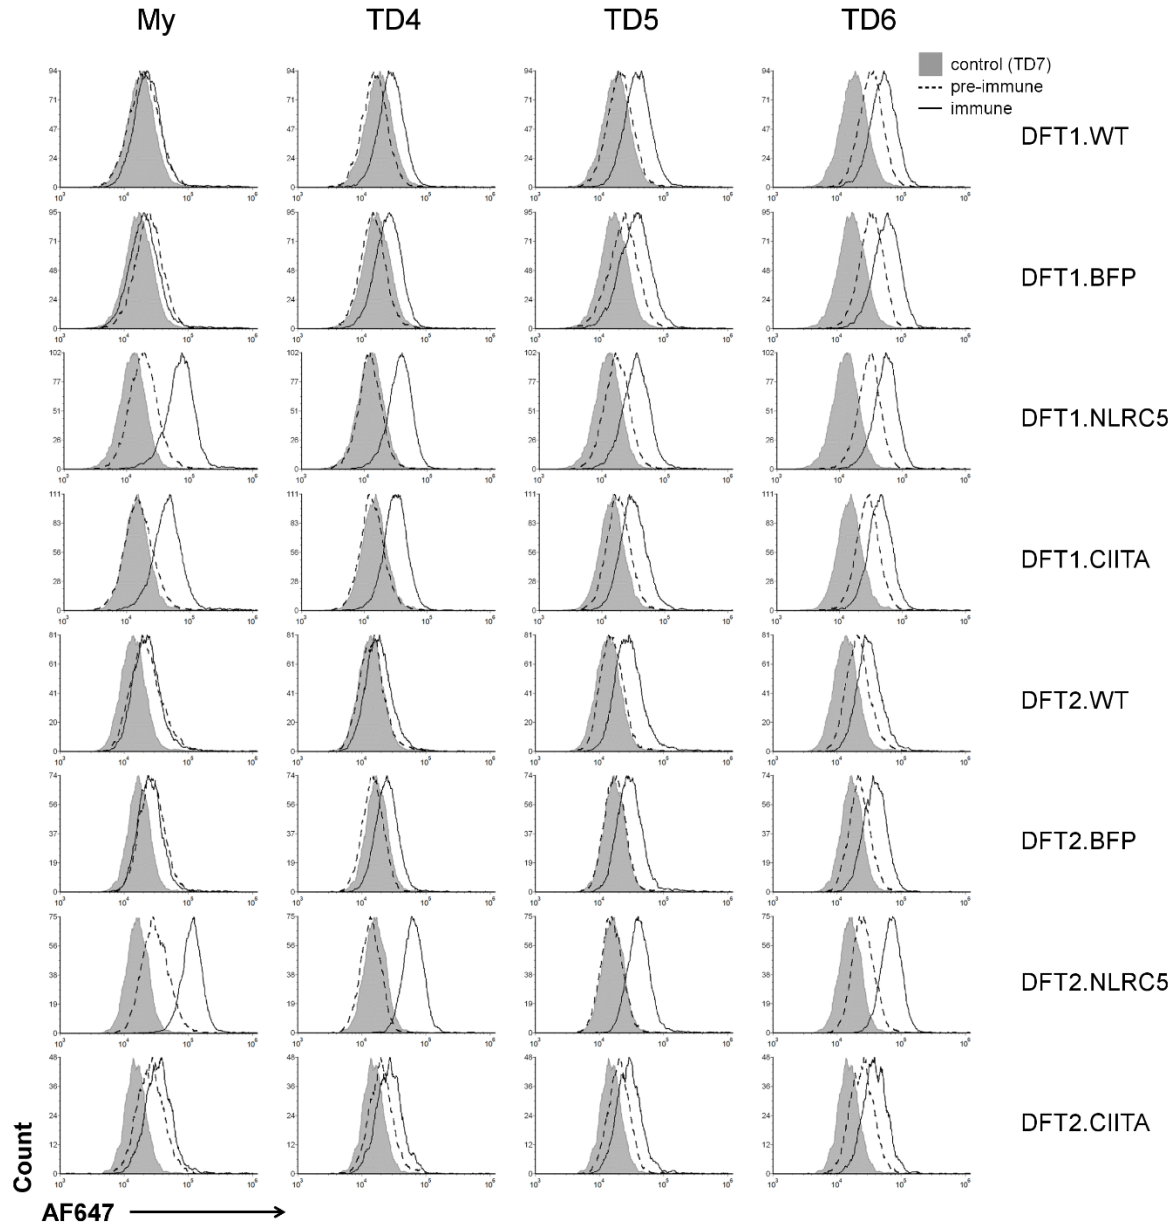

710 Figure 4. Flow cytometric analysis of serum antibody response towards DFT1 and DFT2 cells  
711 overexpressing CIITA. Sera from four devils (My, TD4, TD5, TD6) with antibody responses  
712 to MHC-I<sup>+</sup> DFT1 cells after DFT1 infection (immune) were used. Antibody binding was  
713 compared against wild type (DFT.WT), vector-only (DFT.BFP) and NLRC5-overexpressing  
714 cells (DFT.NLRC5). Serum collected prior to infection (pre-immune) and from a non-infected  
715 devil (TD7) were included as negative controls. AF647, Alexa Fluor 647.
